# Supplementary material
Source: PubMed Central journal article supplement (PMC2724787)
Supplement: supp_P900039-JLR200_P9_00039-JLR_Supplementary_Table_1.pdf [file supp_P900039-JLR200_P9_00039-JLR_Supplementary_Table_1.pdf]

**Supplementary Table 1:** Distribution of polymorphisms in genes known to influence cholesterol absorption.

| <b>Gene (SNP)</b> | <b>Allele</b> | <b>Case<br/>n</b> | <b>Control<br/>n</b> | <b>P-values</b> |
|-------------------|---------------|-------------------|----------------------|-----------------|
| ABCG8(K400T)      | 11/12/22      | 2 22 57           | 6 74 152             | 0.72            |
| ABCG8(Y54C)       | 11/12/22      | 21 33 28          | 33 103 96            | 0.06            |
| ABCG8(A632V)      | 11/12/22      | 51 29 2           | 143 79 9             | 0.82            |
| ABCG8(D19H)       | 11/12/22      | 53 12 2           | 161 31 1             | 0.21            |
| ABCG5(Q604E)      | 11/12/22      | 6 25 51           | 6 62 164             | 0.10            |
| NPCILI (U3)       | 11/12/22      | 48 15 2           | 134 52 7             | 0.79            |
